# Supplementary material for: Somatic genetic rescue of a germline ribosome assembly defect
Source: PubMed Central journal article supplement (PMC8377010; doi:10.1038/s41467-021-24999-5), 2021-08-19
Supplement: 41467_2021_24999_MOESM1_ESM.pdf [file 41467_2021_24999_MOESM1_ESM.pdf]

**Somatic genetic rescue of a germline ribosome assembly defect****List of Supplementary data**

Supplementary Figure 1: FISH probes.

Supplementary Figure 2: Cumulative VAF vs age and cumulative VAF vs mutation count.

Supplementary Figure 3: Correlation between *EIF6* mutation and blood parameters.

Supplementary Figure 4: Sequence alignment of eIF6.

Supplementary Figure 5: FACS analysis of *EIF6* transfection in HEK293T cells.

Supplementary Figure 6: Reduced cofractionation of the Tif6-R61L missense variant with the 60S subunit in yeast.

Supplementary Figure 7: Functional characterization of SDS-related *TIF6* mutant alleles.

Supplementary Figure 8: Contacts at the uL14-eIF6 interaction interface

Supplementary Figure 9: Analysis of the stability of the uL14-eIF6 interaction interface.

Supplementary Figure 10: Cytoplasmic localization of Sbds in *Drosophila* mitotic cells.

Supplementary Figure 11: *EIF6* missense mutations that map to the interface with the 60S ribosomal subunit rescue germline *Sbds* deficiency in *Drosophila*.

Supplementary Figure 12: *EIF6-R61L* and *NI06S* rescue the ribosome assembly defect in *Sbds*-deficient flies.

Supplementary Figure 13: *EIF6* depletion does not increase the amount of free eIF6 in *Sbds*-deficient *Drosophila* cells.

Supplementary Figure 14: Impaired translation due to SBDS protein deficiency in SD-01 patient fibroblasts.

Supplementary Data 1: List of SDS patients (Excel file).

Supplementary Data 2: CADD scores of all *EIF6* SNVs (Excel file).

Supplementary Data 3: SNPs /BAF (Excel file).

Supplementary Table S1: Frequency of eIF6 mutants in gnomAD, COSMIC and TCGA.

Supplementary Tables S2a, S2b: *Drosophila* genotypes and strains.

Supplementary Table S3: Plasmids (Human).

Supplementary Table S4: Oligonucleotides (Human).

Supplementary Table S5: Oligonucleotides (*Dictyostelium*).

Supplementary Table S6: Strains (yeast).

Supplementary Table S7: Oligonucleotides (yeast).

Supplementary Table S8: Plasmids (yeast).

Supplementary Table S9: Oligonucleotides (*Drosophila*).

Supplementary Table S10: Plasmids (*Drosophila*).

Supplementary Table S11: Antibodies.

Supplementary Figure 1

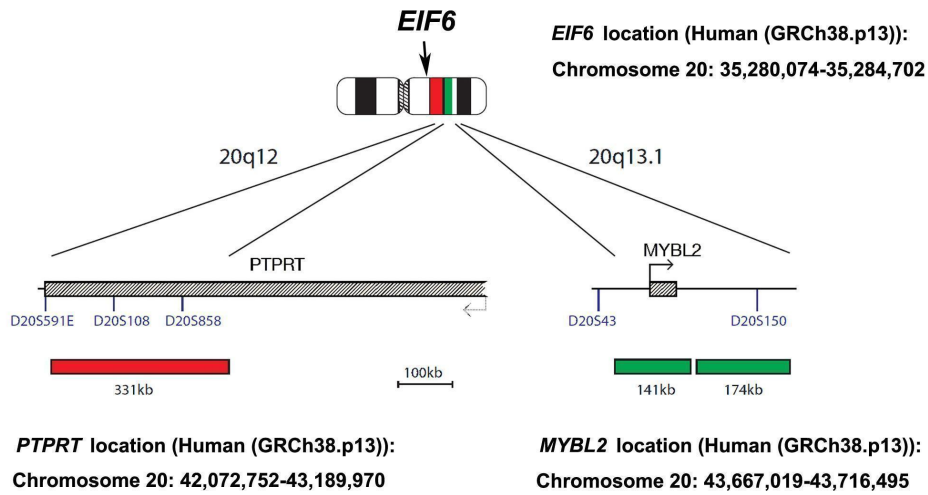

Adapted from <https://www.cytocell.com/probes/23-del20q-deletion>

**Suppl. Fig.1. FISH probes.** Schematic representation of the FISH probes used to detect interstitial deletion on the q-arm of chromosome 20 and physical locations of the genes *PTPRT* and *MYBL2* (detected by FISH probes) and *EIF6*.

## Supplementary Figure 2

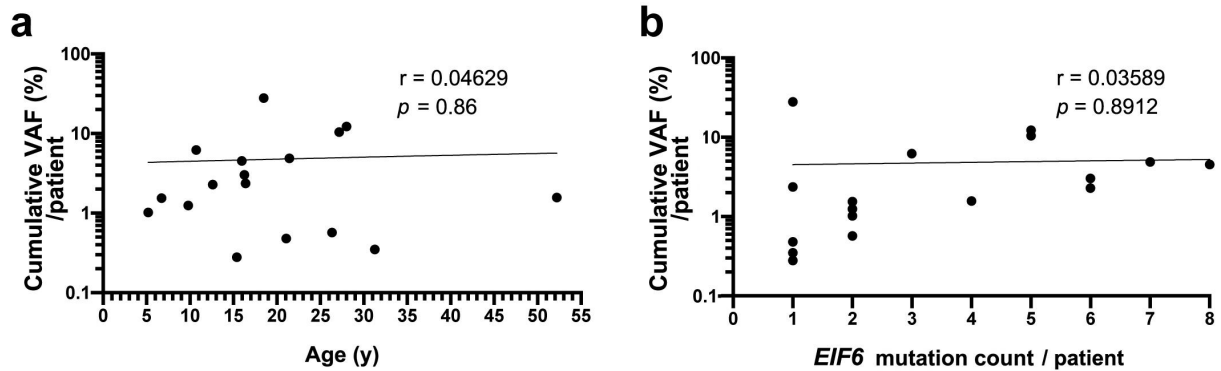

Suppl. Fig. 2. Cumulative VAF vs age and cumulative VAF vs mutation count. No correlation between cumulative *EIF6* VAF and age (a) or *EIF6* mutation count (b) in SDS. P-values and Pearson correlations are indicated.

## Supplementary Figure 3

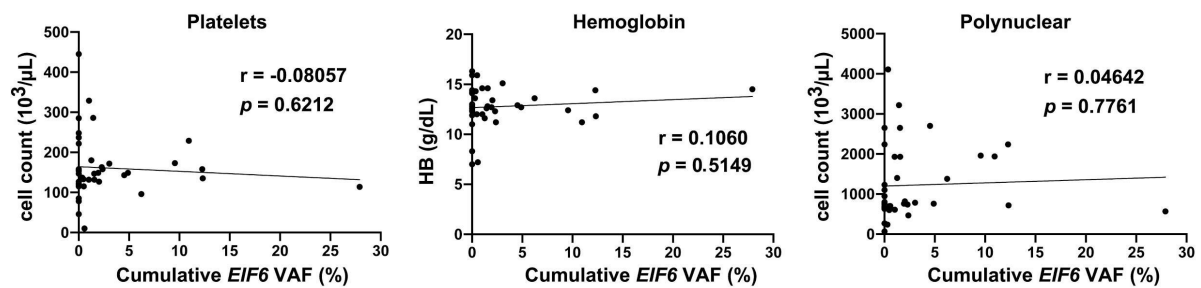

Suppl. Fig. 3. Correlation between *EIF6* mutation and blood parameters Platelets, hemoglobin and white cell counts in patients as a function of cumulative *EIF6* VAF. P-values and Pearson correlations are indicated.

Supplementary Figure 4

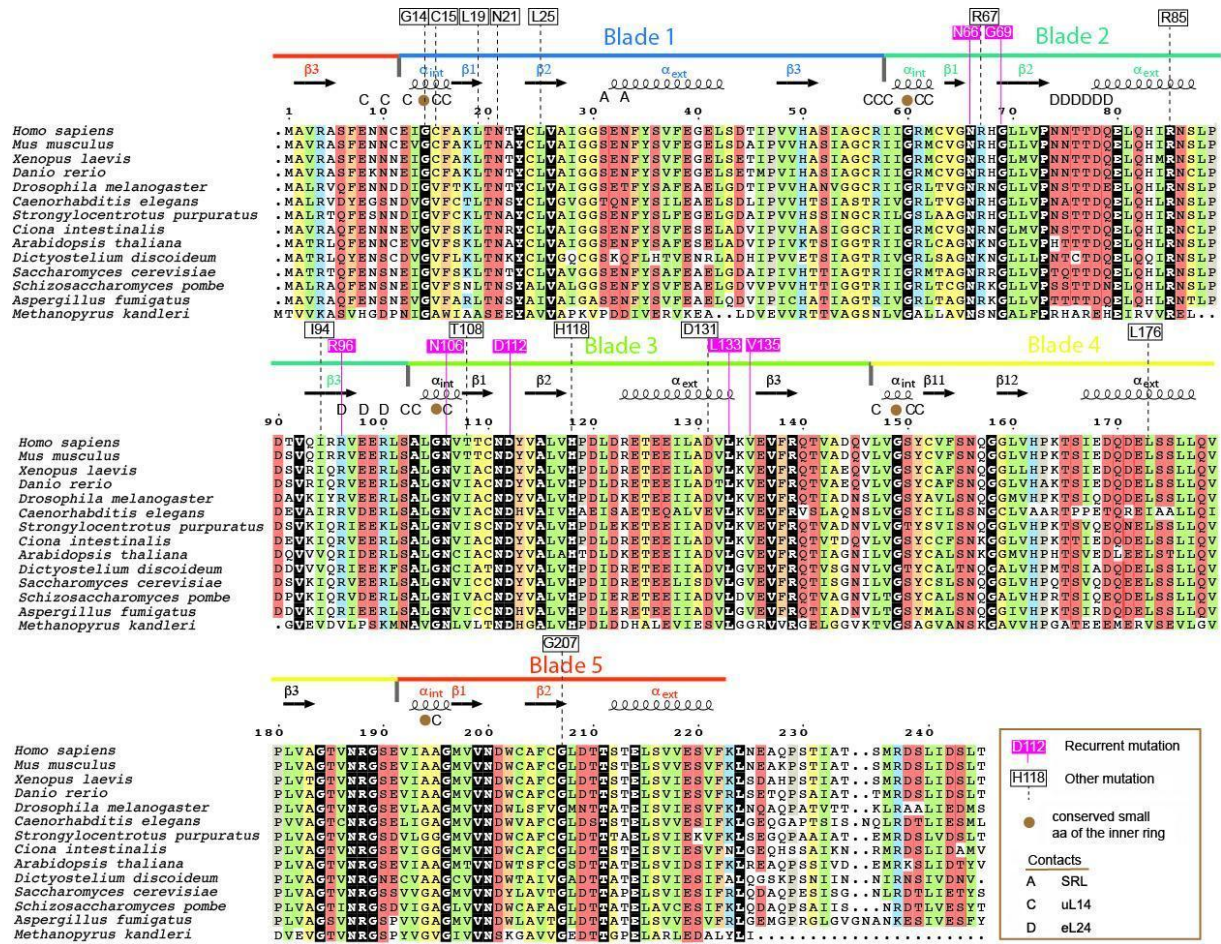

Suppl. Fig. 4. Sequence alignment of eIF6. Residues recurrently mutated in SDS are highlighted in pink. Other amino-acids mutated in SDS are highlighted in black boxes. Figure was drawn using ESPript<sup>1</sup>.

## Supplementary Figure 5

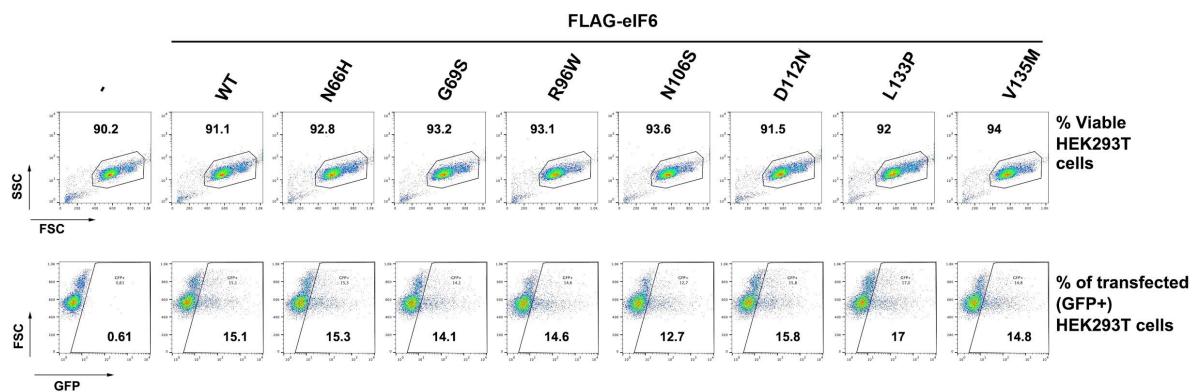

**Suppl. Fig. 5. FACS analysis of *EIF6* transfection in HEK293T cells.** FACS analysis of cell viability (gated on SSC/FSC; up) and efficiency of transfection (GFP+; down) in viable HEK293T cells transfected with the different eIF6-expressing constructs. Cell viability as well as the percentage of transfected cells were similar in all conditions.

## Supplementary Figure 6

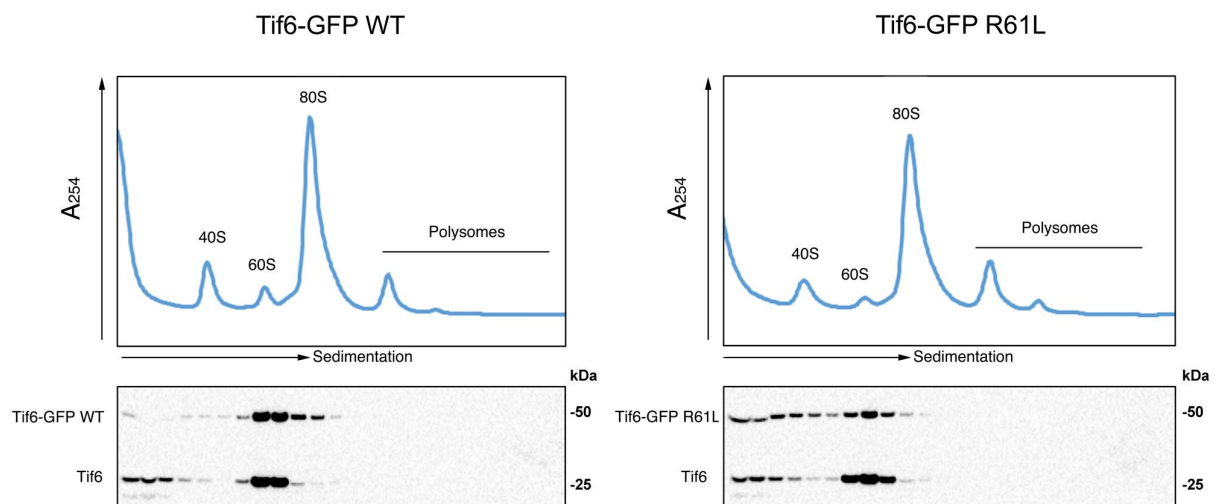

**Suppl. Fig. 6. Reduced cofractionation of the Tif6-R61L missense variant with the 60S subunit in yeast.** Extracts from *Sdo1<sup>ts</sup>* cells (grown at 23 °C) expressing Tif6-GFP WT or Tif6-GFP R61L were fractionated by sucrose gradient sedimentation and Tif6 protein visualized by immunoblotting (2 replicates).

## Supplementary Figure 7

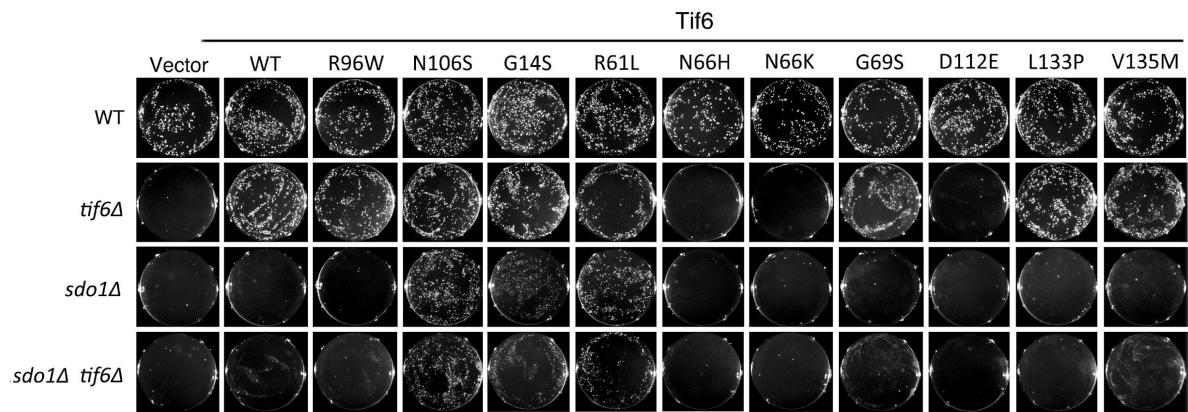

**Suppl. Fig. 7. Functional characterization of SDS-related *TIF6* mutant alleles.** Diploid *SDO1 sdo1Δ TIF6 tif6Δ* cells were transformed with empty vector, WT Tif6 or the indicated Tif6 mutants, sporulated and plated onto appropriate selective media for 3 days at 30 °C (see **Methods**) (2 replicates).



## Supplementary Figure 8

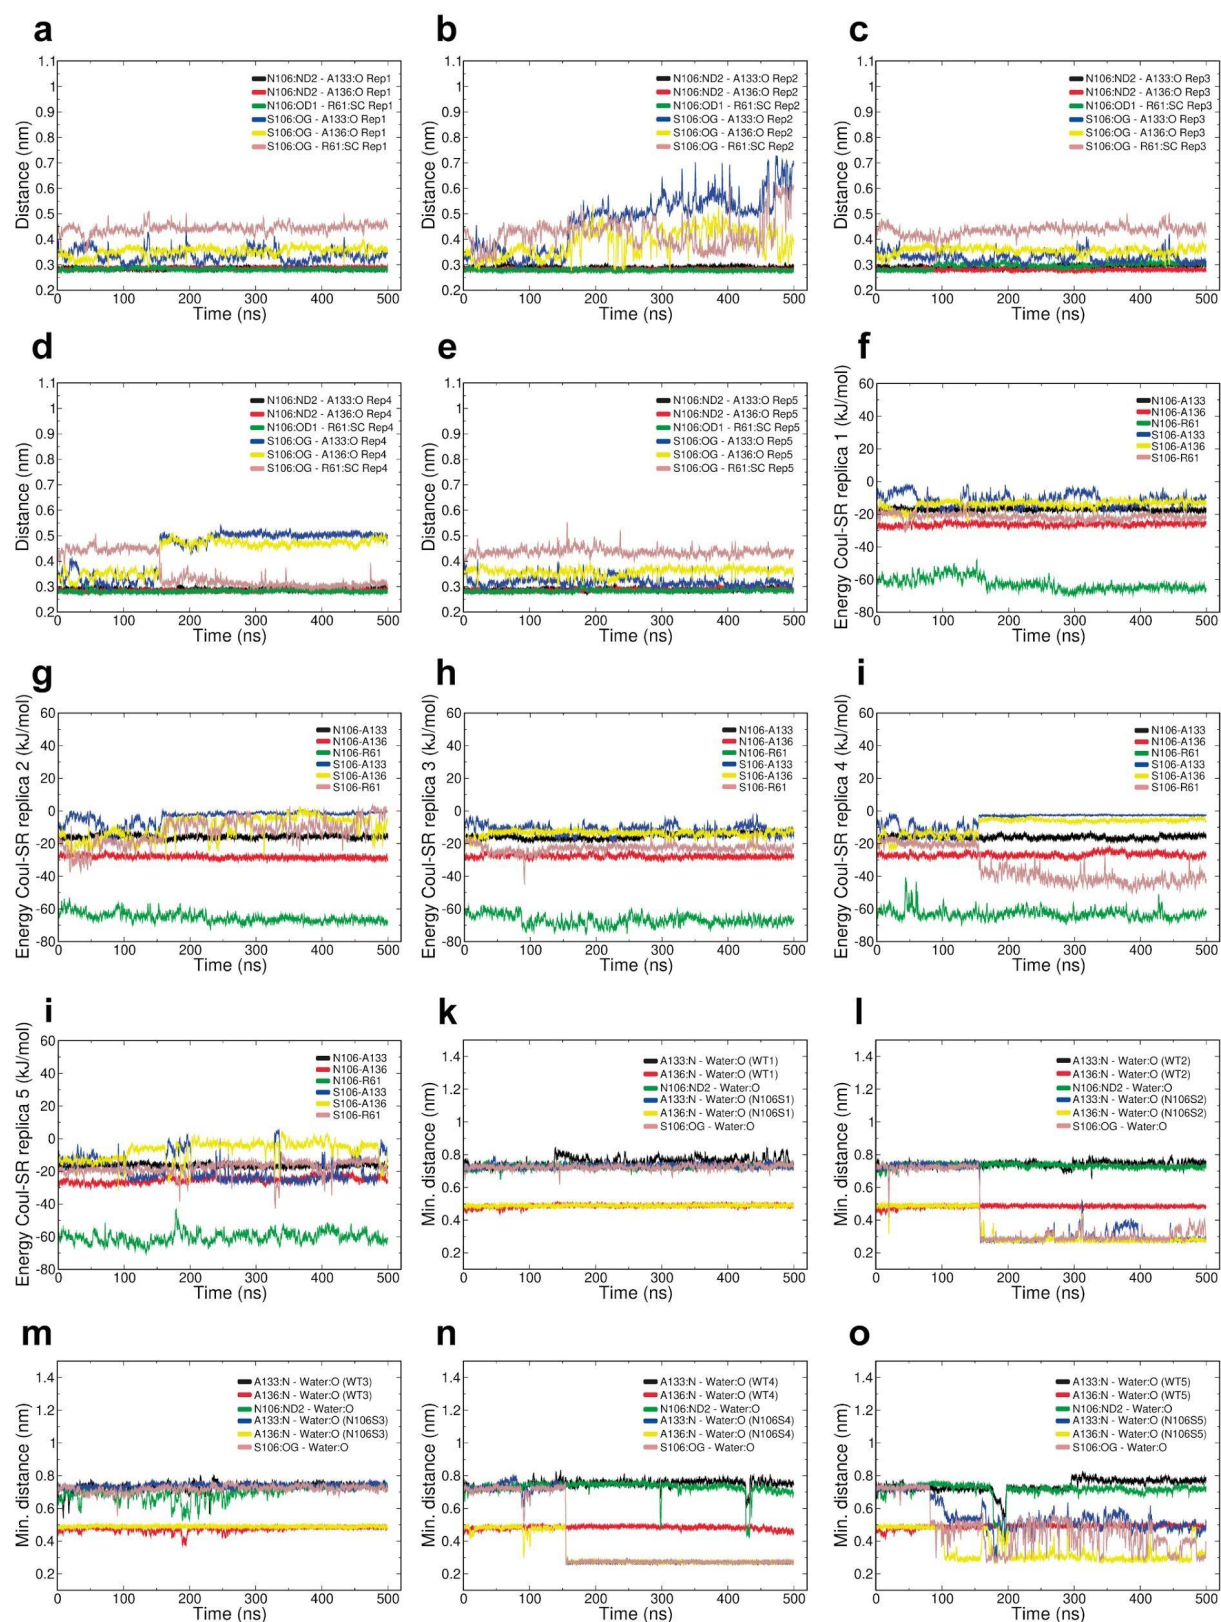

**Suppl. Fig. 8. Contacts at the uL14-eIF6 interaction interface. a-e** Distances (nm) and electrostatic interactions (**f-j**) between the indicated atoms of eIF6 WT and mutant (residues N106, S106 and R61), and uL14 (residues A133, A136) or water (**k-o**).

## Supplementary Figure 9

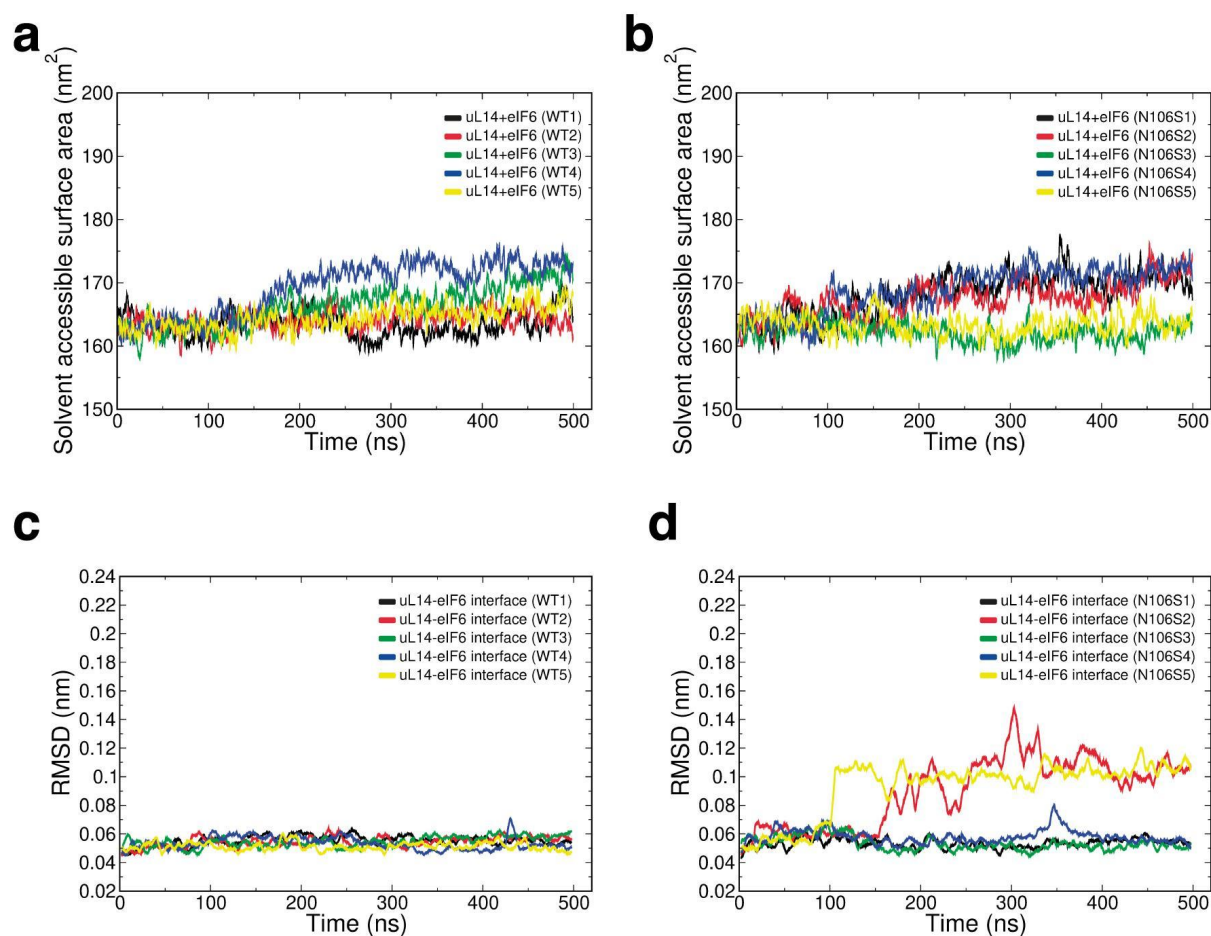

**Suppl. Fig. 9. Analysis of the stability of the uL14-eIF6 interaction interface. a** Solvent accessible surface area of uL14-eIF6 complex of the WT and mutant **(b)** simulations. RMSD of the backbone atoms of the uL14-eIF6 interface in the WT **(c)** and mutant **(d)**.



## Supplementary Figure 10

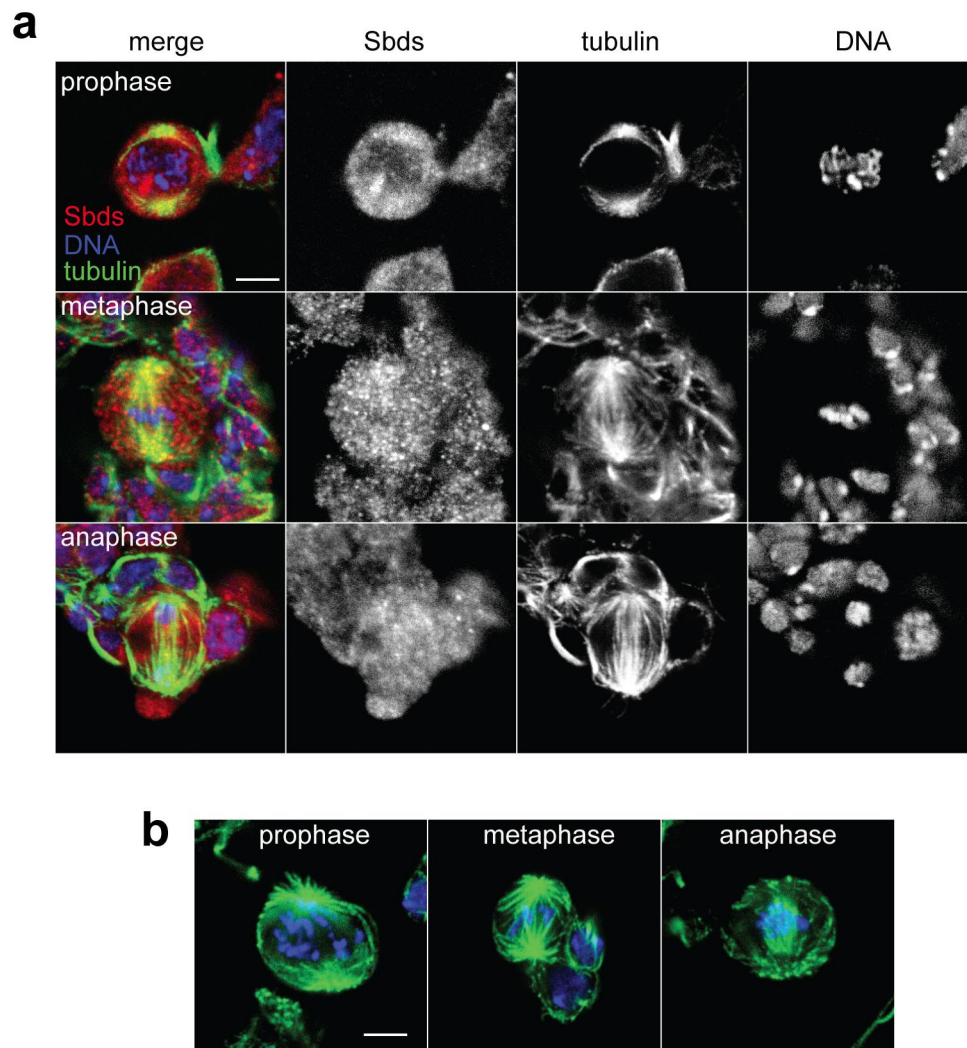

**Suppl. Fig. 10. Cytoplasmic localization of Sbds in *Drosophila* mitotic cells.** **a** Neuroblasts from WT *Drosophila* larvae showing no colocalization of Sbds (red) with microtubules (green, visualized with anti  $\alpha$ -tubulin antibody) in mitotic cells (3 replicates). **b** Neuroblasts from *SbdS*<sup>P/P</sup> mutant larvae show no defects in spindle stabilization in mitotic cells (3 replicates). Microtubules are in green, DNA in blue. Scale bars, 10  $\mu$ m.

## Supplementary Figure 11

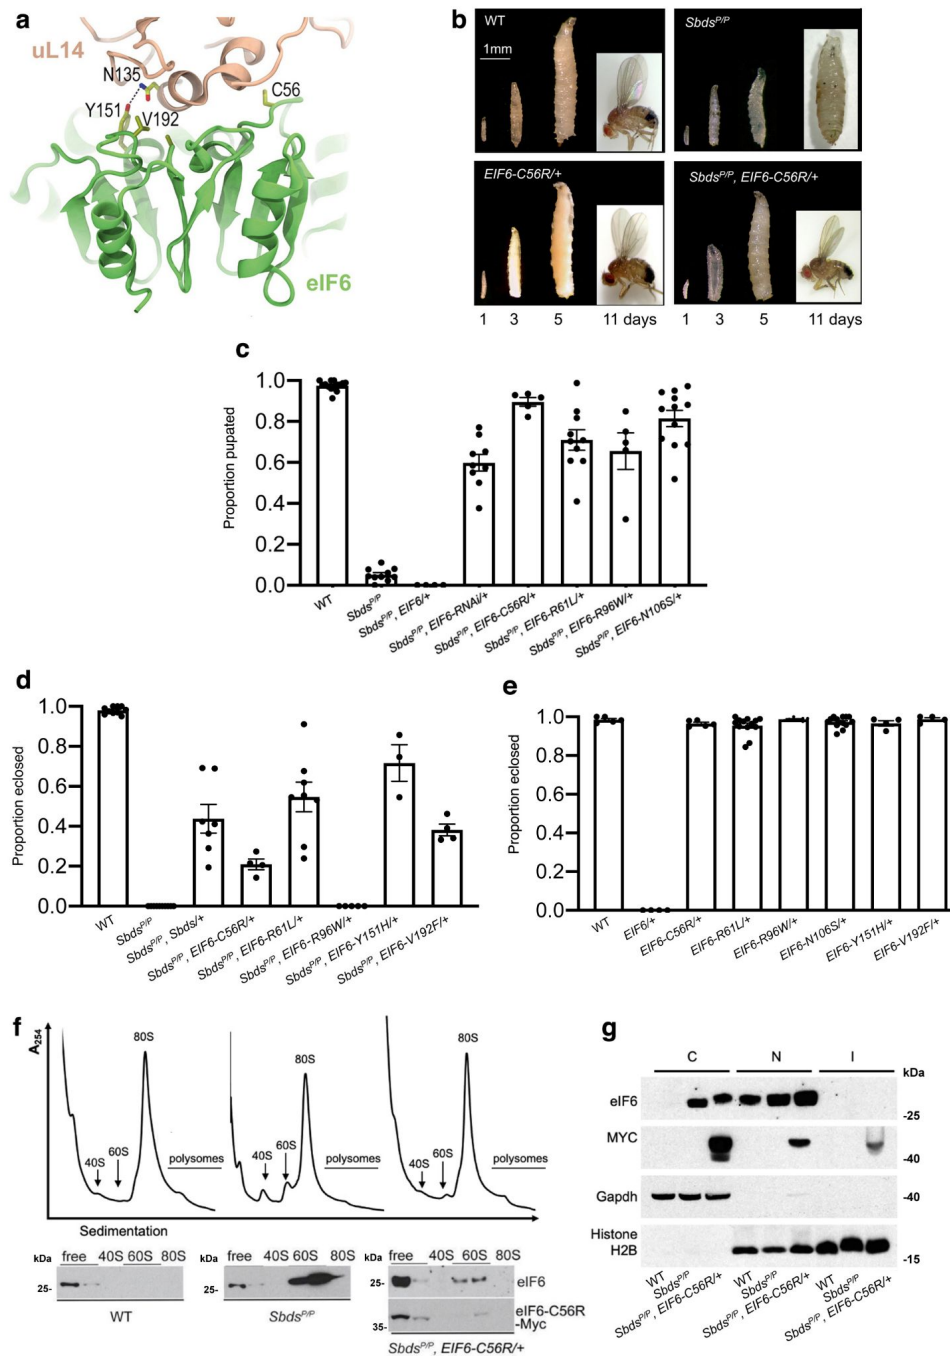

**Suppl. Fig. 11. *EIF6* missense mutations that map to the interface with the 60S ribosomal subunit rescue germline *Sbds* deficiency in *Drosophila*.** **a** *eIF6* residues C56, V192 and Y151 lie at the interface with uL14. *eIF6* is colored green; uL14, salmon. (PDBID: 70W7). **b-d** Knockdown of *eIF6* expression by RNAi or overexpression of *EIF6* missense mutations rescues the larval lethality of *Sbds* deficient *Drosophila*. Development of the indicated fly genotypes at the specified time points after egg laying (3 replicates) (**b**) and the proportion that pupated (error bars indicate s.e.; at least 4 replicates with minimum  $n = 156$ ) (**c**) or eclosed (at least 3 replicates with minimum  $n = 164$ ) (**d**). **e** Expression of *EIF6* WT but not *EIF6* missense variants induces lethality in WT *Drosophila*. The

proportion of the indicated genotypes that eclosed is shown (error bars indicate s.e.; at least 4 replicates with minimum  $n = 150$ ). **f** *EIF6-C56R* rescues the ribosome assembly defect in *Sbds*-deficient flies. Polysome profiles from the indicated fly genotypes (3 replicates). The indicated proteins were visualized by immunoblotting (3 replicates). **g** *EIF6-C56R* rescues the cytoplasmic redistribution of eIF6 in *Sbds*-deficient flies. Subcellular fractions of third instar larval cells with the indicated genotypes were immunoblotted to visualize the indicated proteins. C, cytoplasmic, N, nuclear; I, insoluble nuclear fraction containing nucleoli and chromatin (3 replicates).

## Supplementary Figure 12

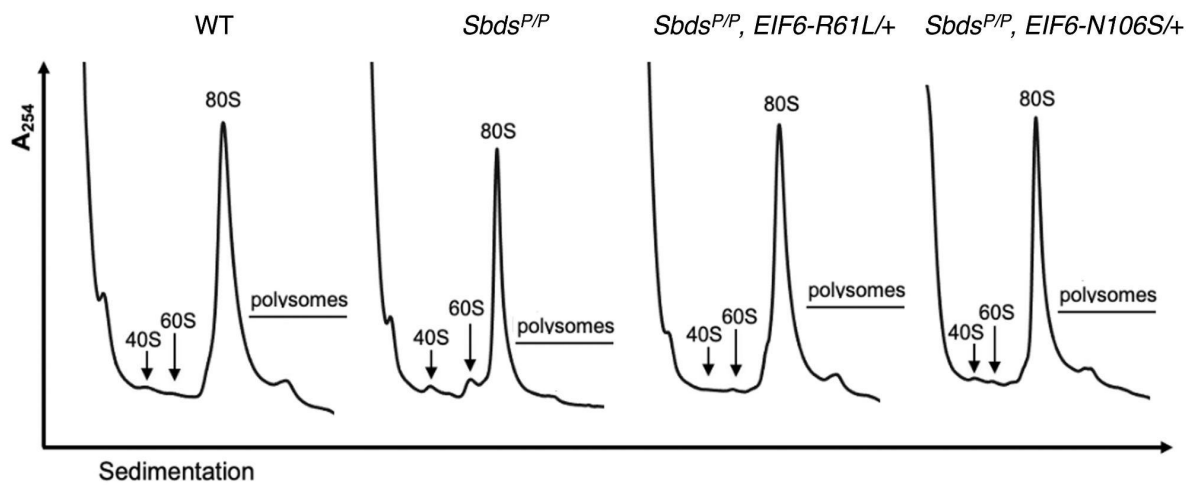

Suppl. Fig. 12. *EIF6-R61L* and *N106S* rescue the ribosome assembly defect in *Sbds*-deficient flies. Polysome profiles from the indicated *Drosophila* genotypes are indicated (2 replicates).

## Supplementary Figure 13

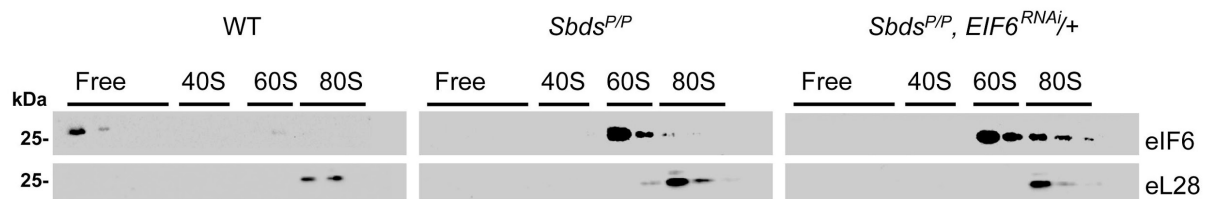

Suppl. Fig. 13. *EIF6* depletion does not increase the amount of free eIF6 in *Sbds*-deficient *Drosophila* cells. Cell extracts from third instar larvae were fractionated by sucrose gradient sedimentation (3 replicates) and immunoblotted to visualize the indicated proteins (2 replicates).

## Supplementary Figure 14

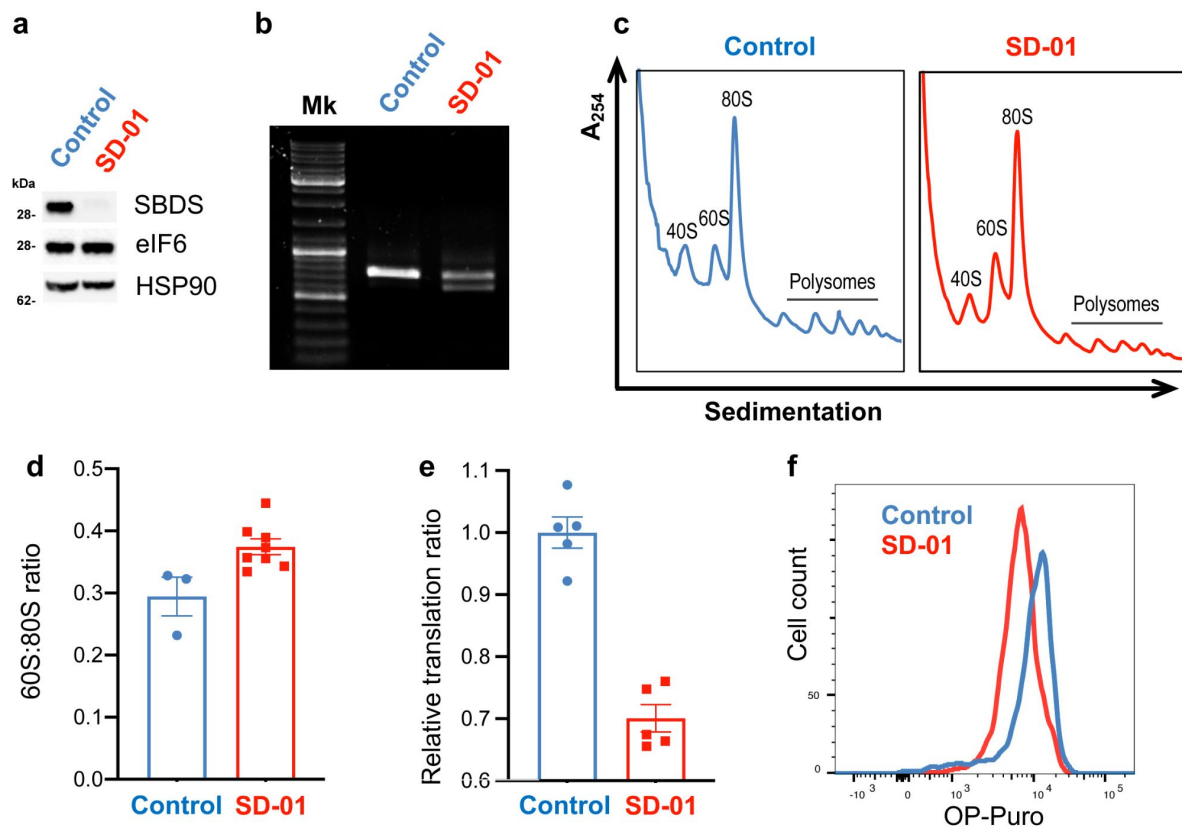**Suppl. Fig. 14. Impaired translation due to SBDS protein deficiency in SD-01 patient fibroblasts.**

**a** Extracts from healthy control or SD-01 patient fibroblasts were immunoblotted to visualize the indicated proteins (3 replicates). **b** RT-PCR of *SBDS* cDNA indicates a splicing anomaly in SD-01 fibroblasts, confirmed by sequencing (3 replicates). **c** Comparison of polysome profiles from control versus SD-01 patient fibroblasts. **d** Quantification of the 60S:80S ribosomal subunit ratios from polysome profiles of SD-01 (8 replicates) and control fibroblasts (3 replicates). **e, f** Relative global translation rates in fibroblasts from control (blue) versus patient SD-01 (red) (5 replicates).



## Supplementary Tables

Supplementary Table S1. Frequency of eIF6 mutants in gnomAD, COSMIC and TCGA

| eIF6 Variant | gnomAD: Allele count (allele frequency) | COSMIC : count (type of cancer)                       | TCGA : count ( type of cancer) |
|--------------|-----------------------------------------|-------------------------------------------------------|--------------------------------|
| N66H         | Absent                                  | Absent                                                | Absent                         |
| G69S         | Absent                                  | 2 (Endometrioid carcinoma - Carcinoma Adenocarcinoma) | Absent                         |
| R96W         | 1 (3.99e-6)                             | 1 (Gastric adenocarcinoma)                            | 1/11519 (stomach)              |
| N106S        | 6 (2.4e-5)                              | Absent                                                | 1/11519 (Corpus uteri)         |
| D112N        | Absent                                  | Absent                                                | Absent                         |
| L133P        | 1 (3.98e-6)                             | Absent                                                | Absent                         |
| V135M        | Absent                                  | Absent                                                | Absent                         |

Supplementary Table S2a. *Drosophila* genotypes

| Figure                  | Name                                         | Genotype                                                                                        |
|-------------------------|----------------------------------------------|-------------------------------------------------------------------------------------------------|
| 7a                      | Sbds <sup>FLAG</sup>                         | w <sup>1118</sup> ; Actin-GAL4/UAS-Sbds-FLAG                                                    |
| 7c                      | Sbds <sup>RNAi</sup>                         | w <sup>1118</sup> ; En-GAL4, UAS-GFP/+; UAS-Sbds <sup>RNAi</sup>                                |
| 7d                      | control                                      | w <sup>1118</sup> ; Da-GAL4                                                                     |
| 7d                      | Sbds <sup>RNAi/+</sup>                       | w <sup>1118</sup> ; Da-GAL4/UAS- Sbds <sup>RNAi/+</sup>                                         |
| 7e                      | control                                      | MS1096-GAL4/Y                                                                                   |
| 7e                      | Sbds <sup>RNAi/+</sup>                       | MS1096-GAL4/Y; UAS- Sbds <sup>RNAi/+</sup>                                                      |
| 7g-m, S11b-g, S12, S13  | WT                                           | w <sup>1118</sup>                                                                               |
| 7g-m, S11b-g, S12, S13  | Sbds <sup>P/P</sup>                          | w <sup>1118</sup> ; Sbds <sup>P/P</sup>                                                         |
| 7h, 7j                  | EIF6/+                                       | w <sup>1118</sup> ; UAS-EIF6-FLAG/+; Da-GAL4 /+                                                 |
| 7h, 7i, S11c            | Sbds <sup>P/P</sup> , EIF6/+                 | w <sup>1118</sup> ; UAS-EIF6-FLAG/+; Da-GAL4, Sbds <sup>P</sup> /Sbds <sup>P</sup>              |
| 7i, 7k, S11c, S11d, S12 | Sbds <sup>P/P</sup> , EIF6-R61L/+            | w <sup>1118</sup> ; UAS-EIF6-R61L-FLAG/+; Da-GAL4, Sbds <sup>P</sup> /Sbds <sup>P</sup>         |
| 7g-m, S11c, S12         | Sbds <sup>P/P</sup> , EIF6-N106S/+           | w <sup>1118</sup> ; UAS-EIF6-N106S-FLAG/+; Da-GAL4, Sbds <sup>P</sup> /Sbds <sup>P</sup>        |
| 7g, 7h, S11b, S13       | Sbds <sup>P/P</sup> , EIF6 <sup>RNAi/+</sup> | w <sup>1118</sup> ; UAS- EIF6 <sup>RNAi/+</sup> ; Da-GAL4, Sbds <sup>P</sup> /Sbds <sup>P</sup> |

|                    |                                                  |                                                                                                                               |
|--------------------|--------------------------------------------------|-------------------------------------------------------------------------------------------------------------------------------|
| S11b-d, S11f, S11g | <i>Sbds</i> <sup>P/P</sup> , <i>EIF6-C56R/+</i>  | <i>w</i> <sup>1118</sup> ; <i>UAS-EIF6-C56R-MYC/+</i> ; <i>Da-GAL4</i> , <i>Sbds</i> <sup>P</sup> / <i>Sbds</i> <sup>P</sup>  |
| 7i, S11c, S11d     | <i>Sbds</i> <sup>P/P</sup> , <i>EIF6-R96W/+</i>  | <i>w</i> <sup>1118</sup> ; <i>UAS-EIF6-R96W-FLAG/+</i> ; <i>Da-GAL4</i> , <i>Sbds</i> <sup>P</sup> / <i>Sbds</i> <sup>P</sup> |
| 7i, S11d           | <i>Sbds</i> <sup>P/P</sup> , <i>Sbds/+</i>       | <i>w</i> <sup>1118</sup> ; <i>Actin-GAL4/UAS-Sbds-FLAG</i> ; <i>Sbds</i> <sup>P/P</sup>                                       |
| 7i                 | <i>Sbds</i> <sup>P/P</sup> , <i>SBDS/+</i>       | <i>w</i> <sup>1118</sup> ; <i>Actin-GAL4/UAS-SBDS-FLAG</i> ; <i>Sbds</i> <sup>P/P</sup>                                       |
| S11d               | <i>Sbds</i> <sup>P/P</sup> , <i>EIF6-Y151H/+</i> | <i>w</i> <sup>1118</sup> ; <i>UAS-EIF6-Y151H-MYC/+</i> ; <i>Da-GAL4</i> , <i>Sbds</i> <sup>P</sup> / <i>Sbds</i> <sup>P</sup> |
| S11d               | <i>Sbds</i> <sup>P/P</sup> , <i>EIF6-V192F/+</i> | <i>w</i> <sup>1118</sup> ; <i>UAS-EIF6-V192F-MYC/+</i> ; <i>Da-GAL4</i> , <i>Sbds</i> <sup>P</sup> / <i>Sbds</i> <sup>P</sup> |
| 7j, S11e           | WT                                               | <i>w</i> <sup>1118</sup> ; <i>Da-GAL4</i>                                                                                     |
| 7j, S11e           | <i>EIF6/+</i>                                    | <i>w</i> <sup>1118</sup> ; <i>UAS-EIF6/+</i> ; <i>Da-GAL4/+</i>                                                               |
| S11e               | <i>EIF6-C56R/+</i>                               | <i>w</i> <sup>1118</sup> ; <i>UAS-EIF6-C56R/+</i> ; <i>Da-GAL4/+</i>                                                          |
| 7j, S11e           | <i>EIF6-R61L/+</i>                               | <i>w</i> <sup>1118</sup> ; <i>UAS-EIF6-R61L/+</i> ; <i>Da-GAL4/+</i>                                                          |
| S11e               | <i>EIF6-R96W/+</i>                               | <i>w</i> <sup>1118</sup> ; <i>UAS-EIF6-R96W/+</i> ; <i>Da-GAL4/+</i>                                                          |
| 7j, S11e           | <i>EIF6-N106S/+</i>                              | <i>w</i> <sup>1118</sup> ; <i>UAS-EIF6-N106S/+</i> ; <i>Da-GAL4/+</i>                                                         |
| S11e               | <i>EIF6-Y151H/+</i>                              | <i>w</i> <sup>1118</sup> ; <i>UAS-EIF6-Y151H/+</i> ; <i>Da-GAL4/+</i>                                                         |
| S11e               | <i>EIF6-V192F/+</i>                              | <i>w</i> <sup>1118</sup> ; <i>UAS-EIF6-V192F/+</i> ; <i>Da-GAL4/+</i>                                                         |

---

Supplementary Table S2b. *Drosophila* strains

| Name                 | Genotype                                                                     | Source                               |
|----------------------|------------------------------------------------------------------------------|--------------------------------------|
| Wild type (WT)       | <i>w<sup>1118</sup></i>                                                      | J. Root (University of Cambridge UK) |
| Sbds <sup>P</sup>    | <i>w<sup>1118</sup>; PBac{WH}CG8549<sup>01686</sup>/TM6B, Tb<sup>1</sup></i> | Exelixis (Harvard)                   |
| Sbds <sup>RNAi</sup> | <i>w<sup>1118</sup>; pUAS-8549-R4</i>                                        | NIG-Fly                              |
| En-GAL4              | <i>W<sup>1118</sup>; P{en2.4-GAL4}e16E, P{UAS-2xEGFP}AH2</i>                 | Bloomington Drosophila Stock Center  |
| MS1096-GAL4          | <i>w<sup>1118</sup> P{GawB-ΔKE}Bx<sup>MS1096-KE</sup></i>                    | Bloomington Drosophila Stock Center  |
| EIF6 <sup>RNAi</sup> | <i>P{KK101259}VIE-260B</i>                                                   | Vienna Drosophila Resource Center    |
| UAS-Sbds             | <i>w<sup>1118</sup>; pUAS-Sbds-FLAG</i>                                      | This study                           |
| UAS-EIF6             | <i>w<sup>1118</sup>; pUAS-EIF6-FLAG</i>                                      | ''                                   |
| UAS-EIF6-R61L        | <i>w<sup>1118</sup>; pUAS-EIF6-R61L-FLAG</i>                                 | ''                                   |
| UAS-EIF6-R96W        | <i>w<sup>1118</sup>; pUAS-EIF6-R96W-FLAG</i>                                 | ''                                   |
| UAS-EIF6-N106S       | <i>w<sup>1118</sup>; pUAS-EIF6-N106S-FLAG</i>                                | ''                                   |
| UAS-EIF6-C56R        | <i>w<sup>1118</sup>; pUAS-EIF6-C56R-MYC</i>                                  | ''                                   |
| UAS-EIF6-Y151H       | <i>w<sup>1118</sup>; pUAS-EIF6-Y151H-MYC</i>                                 | ''                                   |
| UAS-EIF6-V192F       | <i>w<sup>1118</sup>; pUAS-EIF6-V192F-MYC</i>                                 | ''                                   |
| UAS-SBDS             | <i>w<sup>1118</sup>; pUAS-SBDS-FLAG</i>                                      | ''                                   |

**Supplementary Table S3. Plasmids (Human)**

| <b>Plasmid</b>              | <b>Source</b> |
|-----------------------------|---------------|
| p3xFLAG-Myc-CMV-26          | Sigma         |
| p3xFLAG- <i>EIF6</i> -WT    | This study    |
| p3xFLAG- <i>EIF6</i> -N66H  | This study    |
| p3xFLAG- <i>EIF6</i> -G69S  | This study    |
| p3xFLAG- <i>EIF6</i> -R96W  | This study    |
| p3xFLAG- <i>EIF6</i> -D112N | This study    |
| p3xFLAG- <i>EIF6</i> -L133P | This study    |
| p3xFLAG- <i>EIF6</i> -V135M | This study    |

---



**Supplementary Table S4. Oligonucleotides (Human)**

| <b>Name</b>                | <b>Sequence 5'-3'</b>                                |
|----------------------------|------------------------------------------------------|
| CMV26-FLAG-NotI-eIF6-NEB-F | GGATGACGATGACAAGCTTGC GGCCGCGATGGCGGTCCGAGCTTCGTTTCG |
| CMV26-FLAG-NotI-eIF6-NEB-R | AGAGTCGACTGGTACCGATATCAGATCTTCAGGTGAGGCTGTCAATGAGG   |
| h-eIF6-F                   | GTGTGAGGGGAACCTGGGAG                                 |
| h-eIF6-R                   | GAGCCAGGAGCCCATGGAAC                                 |
| h-eIF6-N106S-F             | GCTCTCAGCCTTGGGCAGTGTCAACACCTGC                      |
| h-eIF6-N106S-R             | GCAGGTGGTGACACTGCCCAAGGCTGAGAGC                      |
| h-eIF6-R96W-F              | TGCAGATTAGGTGGGTGGAGGAGC                             |
| h-eIF6-R96W-R              | GCTCCTCCACCCACCTAATCTGCA                             |
| h-eIF6-G69S-F              | GGAACAGGCACAGTCTCCTGGTACC                            |
| h-eIF6-G69S-R              | GGTACCAGGAGACTGTGCCTGTTCC                            |
| h-eIF6-N66H-F              | ATGTGTGTGGGGCACAGGCACGGTCTC                          |
| h-eIF6-N66H-R              | GAGACCGTGCCTGTGCCCCACACACAT                          |
| h-eIF6-D112N-F             | CACCACCTGCAATAACTACGTGGCCTTG                         |
| h-eIF6-D112N-R             | CAAGGCCACGTAGTTATTGCAGGTGGTG                         |
| h-eIF6-L133P-F             | CTGGCAGATGTGCCCAAGGTGGAAGTC                          |
| h-eIF6-L133P-R             | GACTTCCACCTTGGGCACATCTGCCAG                          |
| h-eIF6-V135M-F             | GATGTGCTCAAGATGGAAGTCTTCAG                           |
| h-eIF6-V135M-R             | CTGAAGACTTCCATCTTGAGCACATC                           |
| h-SBDS-F                   | CACCATGTCGATCTTCACCCCCAC                             |
| h-SBDS-R                   | TTCAAATTTCTCATCTCCTTC                                |

**Supplementary Table S5. Oligonucleotides (*Dictyostelium*)**

---

|       |                                                              |
|-------|--------------------------------------------------------------|
| DT01  | TAAG <u>GGCCC</u> GATGTAAAACATGAAAATTTTTGGATGTA CTG          |
| DT03  | CATGGATCCTATCTTTGCTCTTCAAGGCTCTAAACCATCAAAC                  |
| DT04  | AAAC <u>CGCGGA</u> AAGGCAATTAAGCCATATCATAGAATTAAGCAC         |
| DT09  | AAAG <u>GGCCC</u> ATCGCAACTGTTTTTCATATTGTAATCC               |
| DT016 | CTTGTA CTTGTTTAAAGGACGTA CTATTG                              |
| DT018 | CATCGCACTACGTATAATTTAACACTTTGCTC                             |
| DT028 | GTATTGCAGGTACACGTA CTGTTGGTCGTTTATCAG                        |
| DT029 | CTGATAAACGACCAACAGTACGTGTACCTGCAATAC                         |
| DT030 | CTCAGCATTGGGTAGTTGTATCGCCACAAATGATTATG                       |
| DT031 | CATAATCATTGTGGCGATACTACCCAATGCTGAG                           |
| MR7   | CATCATGAAAATTTATATTTTCAAGGTATGGCTACAAGATTACAATAT<br>GAAAACAG |
| MR11  | AGTGCAGATCTTTATACATTATCAACAATTGAATTTTC                       |
| MR15  | GTAGAGACAAGTATTGCAGGTAAACGTATTGTTGG                          |
| MR16  | CCAACAATACGTTTACCTGCAATACTTGTCTCTAC                          |

---

**Underlined residues are restriction enzyme sites.**

Supplementary Table S6. Yeast strains

| Yeast strain                    | Genotype                                                                                                                                                                                                                                      | Source     |
|---------------------------------|-----------------------------------------------------------------------------------------------------------------------------------------------------------------------------------------------------------------------------------------------|------------|
| BGY28; <i>sdo1<sup>ts</sup></i> | <i>MAT<math>\alpha</math> can1<math>\Delta</math>::MFA1pr-HIS3 lyp1<math>\Delta</math> his3<math>\Delta</math>1 leu2<math>\Delta</math>0 ura3<math>\Delta</math>0 met15<math>\Delta</math>0 sdo1<sup>ts</sup>:kanMX</i>                       | This study |
| NE0257                          | <i>MAT<math>\alpha</math> can1<math>\Delta</math>::MFA1pr-HIS3 lyp1<math>\Delta</math> his3<math>\Delta</math>1 leu2<math>\Delta</math>0 ura3<math>\Delta</math>0 met15<math>\Delta</math>0 sdo1<sup>ts</sup>:kanMX pRS316 URA3</i>           | ''         |
| NE0259                          | <i>MAT<math>\alpha</math> can1<math>\Delta</math>::MFA1pr-HIS3 lyp1<math>\Delta</math> his3<math>\Delta</math>1 leu2<math>\Delta</math>0 ura3<math>\Delta</math>0 met15<math>\Delta</math>0 sdo1-VMA1-ts:kanMX pRS316 URA3 TIF6-GFP</i>       | ''         |
| NE0261                          | <i>MAT<math>\alpha</math> can1<math>\Delta</math>::MFA1pr-HIS3 lyp1<math>\Delta</math> his3<math>\Delta</math>1 leu2<math>\Delta</math>0 ura3<math>\Delta</math>0 met15<math>\Delta</math>0 sdo1-VMA1-ts:kanMX pRS316 URA3 tif6-G14S-GFP</i>  | ''         |
| ZBY0001                         | <i>MAT<math>\alpha</math> can1<math>\Delta</math>::MFA1pr-HIS3 lyp1<math>\Delta</math> his3<math>\Delta</math>1 leu2<math>\Delta</math>0 ura3<math>\Delta</math>0 met15<math>\Delta</math>0 sdo1-VMA1-ts:kanMX pRS316 URA3 tif6-R61L-GFP</i>  | ''         |
| ZBY0002                         | <i>MAT<math>\alpha</math> can1<math>\Delta</math>::MFA1pr-HIS3 lyp1<math>\Delta</math> his3<math>\Delta</math>1 leu2<math>\Delta</math>0 ura3<math>\Delta</math>0 met15<math>\Delta</math>0 sdo1-VMA1-ts:kanMX pRS316 URA3 tif6-N66H-GFP</i>  | ''         |
| ZBY0003                         | <i>MAT<math>\alpha</math> can1<math>\Delta</math>::MFA1pr-HIS3 lyp1<math>\Delta</math> his3<math>\Delta</math>1 leu2<math>\Delta</math>0 ura3<math>\Delta</math>0 met15<math>\Delta</math>0 sdo1-VMA1-ts:kanMX pRS316 URA3 tif6-N66K-GFP</i>  | ''         |
| ZBY0004                         | <i>MAT<math>\alpha</math> can1<math>\Delta</math>::MFA1pr-HIS3 lyp1<math>\Delta</math> his3<math>\Delta</math>1 leu2<math>\Delta</math>0 ura3<math>\Delta</math>0 met15<math>\Delta</math>0 sdo1-VMA1-ts:kanMX pRS316 URA3 tif6-G69S-GFP</i>  | ''         |
| NE0267                          | <i>MAT<math>\alpha</math> can1<math>\Delta</math>::MFA1pr-HIS3 lyp1<math>\Delta</math> his3<math>\Delta</math>1 leu2<math>\Delta</math>0 ura3<math>\Delta</math>0 met15<math>\Delta</math>0 sdo1-VMA1-ts:kanMX pRS316 URA3 tif6-R96W-GFP</i>  | ''         |
| NE0269                          | <i>MAT<math>\alpha</math> can1<math>\Delta</math>::MFA1pr-HIS3 lyp1<math>\Delta</math> his3<math>\Delta</math>1 leu2<math>\Delta</math>0 ura3<math>\Delta</math>0 met15<math>\Delta</math>0 sdo1-VMA1-ts:kanMX pRS316 URA3 tif6-N106S-GFP</i> | ''         |
| NE0271                          | <i>MAT<math>\alpha</math> can1<math>\Delta</math>::MFA1pr-HIS3 lyp1<math>\Delta</math> his3<math>\Delta</math>1 leu2<math>\Delta</math>0 ura3<math>\Delta</math>0 met15<math>\Delta</math>0 sdo1-VMA1-ts:kanMX pRS316 URA3 tif6-D112E-GFP</i> | ''         |
| ZBY0005                         | <i>MAT<math>\alpha</math> can1<math>\Delta</math>::MFA1pr-HIS3 lyp1<math>\Delta</math> his3<math>\Delta</math>1 leu2<math>\Delta</math>0 ura3<math>\Delta</math>0 met15<math>\Delta</math>0 sdo1-VMA1-ts:kanMX pRS316 URA3</i>                | ''         |

*tif6-L133P-GFP*

ZBY0006

*MAT $\alpha$  can1 $\Delta$ ::MFA1pr-HIS3 lyp1 $\Delta$  his3 $\Delta$ 1 leu2 $\Delta$ 0* ”  
*ura3 $\Delta$ 0 met15 $\Delta$ 0 sdo1-VMA1-ts:kanMX pRS316 URA3*  
*tif6-V135M-GFP*

AJW3

*MAT $\alpha$ / $\alpha$  lyp1 $\Delta$ /+ mfa1 $\Delta$ ::MFA1pr-LEU2/+* Menne et al.<sup>2</sup>  
*can1 $\Delta$ ::MFA1pr-HIS3/+ his3 $\Delta$ 1/his3 $\Delta$ 1 leu2 $\Delta$ 0/leu2 $\Delta$ 0*  
*ura3 $\Delta$ 0/ura3 $\Delta$ 0 met15 $\Delta$ 0/met15 $\Delta$ 0*  
*sdo1 $\Delta$ ::NatMX4/SDO1 tif6 $\Delta$ ::KanMX4/TIF6*

---

**Supplementary Table S7. Oligonucleotides (Yeast)**

| <b>Primer</b> | <b>Sequence</b>                    |
|---------------|------------------------------------|
| G14S Forward  | AATGAAATCAGTGTATTCTCCAAATTAACG     |
| G14S Reverse  | AGAATACACTGATTTTCATTGGAGTTTTCAA    |
| R61L Forward  | ACGCGTATCATCGGTTTGATGACCGCGGGTAACC |
| R61L Reverse  | GGTTACCCGCGGTCATCAAACCGATGATACGCGT |
| N66H Forward  | GCGGGTCACCGTAGAGGTCTGCTAGTTC       |
| N66H Reverse  | CCTCTACGGTGACCCGCGGTCATTCTAC       |
| N66K Forward  | GCGGGTAAACGTAGAGGTCTGCTAGTTC       |
| N66K Reverse  | CCTCTACGTTTACCCGCGGTCATTCTAC       |
| G69S Forward  | ACCGTAGAAGTCTGCTAGTTCCAACCCAAA     |
| G69S Reverse  | GTTGGAAGTACGAGACTTCTACGGTTACCC     |
| R96W Forward  | AAGATTCAATGGGTAGAGGAAAGACTATC      |
| R96W Reverse  | CCTCTACCCATTGAATCTTAACGGAATCC      |
| N106S Forward | CCTTGGGTAGCGTCATCTGTTGTAATGATTA    |
| N106S Reverse | CAGATGACGCTACCCAAGGCAGATAGTCTTT    |
| D112E Forward | TTGTAATGAGTACGTTGCTTTAGTGCAT       |
| D112E Reverse | AGCAACGTACTCATTACAACAGATGACG       |
| L133P Forward | TGATGTACCAGGCGTTGAGGTCTTCCGTC      |
| L133P Reverse | CAACGCCTGGTACATCACTTATCAATTCT      |
| V135M Forward | TACTAGGCATGGAGGTCTTCCGTCAAACCA     |
| V135M Reverse | AAGACCTCCATGCCTAGTACATCACTTATC     |



**Supplementary Table S8. Plasmids (Yeast)**

| <b>Plasmid</b>  | <b>Description</b> | <b>Source</b> |
|-----------------|--------------------|---------------|
| pRS316          | URA3 CEN           | Sean Munro    |
| pTIF6-GFP       | URA3 CEN           | Louise Tonkin |
| pTIF6-G14S-GFP  | URA3 CEN           | This study    |
| pTIF6-R61L-GFP  | URA3 CEN           | This study    |
| pTIF6-N66H-GFP  | URA3 CEN           | This study    |
| pTIF6-N66K -GFP | URA3 CEN           | This study    |
| pTIF6-G69S-GFP  | URA3 CEN           | This study    |
| pTIF6-R96W-GFP  | URA3 CEN           | This study    |
| pTIF6-N106S-GFP | URA3 CEN           | This study    |
| pTIF6-D112E-GFP | URA3 CEN           | This study    |
| pTIF6-L133P-GFP | URA3 CEN           | This study    |
| pTIF6-V135M-GFP | URA3 CEN           | This study    |

---

**Supplementary Table S9. Oligonucleotides (*Drosophila*)**

| Name     |             | Sequence 5'-3'                  |
|----------|-------------|---------------------------------|
| D-S      | bds-F       | CACCATGTCCAAAATATTCACG          |
| D-S      | bds-R       | GAAGAGTTCCTCGCTCTCCAC           |
| D-E      | IF6-F       | CACCATGGCTCTACGCGTCC            |
| D-E      | IF6-R       | GGACATGTCCTCGATGAGGGC           |
| D-E      | IF6-C56R-F  | TGGTGCATGCGAATGTGGGCGGCCGTCGGAT |
| D-E      | IF6-C56R-R  | GCTGTGCCTGGTTAAGCTTGAAGAC       |
| D-E      | IF6-R61L-F  | CTGCCGGATCATCGGCCTACTCACCG      |
| D-E      | IF6-R96W-F  | CGTGAAGATTTATTGGGTGGAGG         |
| D-E      | IF6-N106S-F | CTGTCCGCGCTGGGCTCCGTTATCGC      |
| D-E      | IF6-Y151H-F | CGGTGGATCCGAGACCTTCTAC          |
| D-E      | IF6-Y151H-R | GGTTGCTCAGCACGGCGTGAGAGC        |
| D-E      | IF6-V192F-F | CGGTGGATCCGAGACCTTCTAC          |
| D-E      | IF6-V192F-R | CCATGCCGGCGGCGAGGAATTCGC        |
| h-SBDS-F |             | CACCATGTCGATCTTCACCCCCAC        |
| h-SBDS-R |             | TTCAAATTTCTCATCTCCTTC           |

**Supplementary Table S10. Plasmids (*Drosophila*)**

---

| <b>Name</b>                 | <b>Source</b>                            |
|-----------------------------|------------------------------------------|
| <i>pTWF</i>                 | The Drosophila Gateway vector collection |
| <i>pPWM</i>                 | The Drosophila Gateway vector collection |
| <i>pRSETA-SBDS</i>          | Finch et al. <sup>3</sup>                |
| <i>pUAS-SBDS-FLAG</i>       | This study                               |
| <i>pUAS-Sbds-FLAG</i>       | This study                               |
| <i>pUAS-EIF6-FLAG</i>       | This study                               |
| <i>pUAS-EIF6-R61L-FLAG</i>  | This study                               |
| <i>pUAS-EIF6-R96W-FLAG</i>  | This study                               |
| <i>pUAS-EIF6-N106S-FLAG</i> | This study                               |
| <i>pUAS-EIF6-C56R-MYC</i>   | This study                               |
| <i>pUAS-EIF6-N106S-MYC</i>  | This study                               |

---

**Supplementary Table S11. Antibodies**

| Name                             | Source (RRID)                      | Application (dilution)   |
|----------------------------------|------------------------------------|--------------------------|
| anti- $\alpha$ -tubulin          | Sigma, #T6199 (AB_477583)          | IB (1/2000), IF (1/1000) |
| anti- $\beta$ -actin             | Sigma, #A5316 (AB_476743)          | IB (1/1000)              |
| anti-cMyc                        | Sigma, #M5546 (AB_260581)          | IB (1/500), IF (1:200)   |
| anti-Drosophila-Sbds             | A.J. Warren                        | IB (1/1000), IF (1/500)  |
| anti-eIF6                        | GenTex, #GTX117971 (AB_11173506)   | IB (1/1000)              |
| anti-FLAG                        | Sigma, #F3165 (AB_259529)          | IB (1/1000), IF (1/500)  |
| Anti-DDDDK                       | Abcam, #ab1257 (AB_299216)         | IB (1/20,000)            |
| anti-GAPDH                       | Sigma, #G9545 (AB_796208)          | IB (1/10,000)            |
| anti-histone-H2B                 | Millipore, #07-371 (AB_310561)     | IB (1/1000)              |
| anti-histone-H3                  | Abcam, #ab1791 (AB_302613)         | IB (1/1000)              |
| anti-eL28                        | Santa Cruz, #sc-14151 (AB_2181749) | IB (1/1000)              |
| anti-uL14                        | Abcam, #ab112587 (AB_10866400)     | IB (1/2000)              |
| anti-eS6                         | Cell signaling, #2317 (AB_2238583) | IB (1/1000)              |
| anti-eL8                         | Ziemecki et al <sup>4</sup>        | IB (1/1000)              |
| Anti-mouse IgG HRP               | Sigma, #A5278 (AB_258232)          | IB (1/10,000)            |
| anti-goat IgG HRP                | Santa Cruz, #sc-2020 (AB_631728)   | IB (1/10,000)            |
| anti-rabbit IgG HRP              | Cell Signaling, #7074 (AB_2099233) | IB (1/5000)              |
| anti-mouse IgG, Alexa Fluor 488  | Invitrogen, # A-21202 (AB_141607)  | IF (1/1000)              |
| anti-mouse IgG, Alexa Fluor 568  | Invitrogen, # A-10037 (AB_2534013) | IF (1/1000)              |
| anti-rabbit IgG, Alexa Fluor 488 | Invitrogen, # A-21206 (AB_2535792) | IF (1/1000)              |

|                                                           |            |
|-----------------------------------------------------------|------------|
| anti-rabbit IgG, Alexa Invitrogen, # A-10042 (AB_2534017) | IF (1/500) |
| Fluor 568                                                 |            |
| anti-rabbit IgG, Alexa Invitrogen, # A-21244 (AB_2535812) | IF (1/500) |
| Fluor 647                                                 |            |

---

### Supplementary References

1. Gouet, P., Courcelle, E., Stuart, D.I. & Metz, F. ESPript: analysis of multiple sequence alignments in PostScript. *Bioinformatics* **15**, 305-8 (1999).
2. Menne, T.F. et al. The Shwachman-Bodian-Diamond syndrome protein mediates translational activation of ribosomes in yeast. *Nat Genet* **39**, 486-495 (2007).
3. Finch, A.J. et al. Uncoupling of GTP hydrolysis from eIF6 release on the ribosome causes Shwachman-Diamond syndrome. *Genes Dev* **25**, 917-929 (2011).
4. Ziemiecki, A., Muller, R.G., Fu, X.C., Hynes, N.E. & Kozma, S. Oncogenic activation of the human trk proto-oncogene by recombination with the ribosomal large subunit protein L7a. *EMBO J* **9**, 191-6 (1990).
