# Supplementary material for: Somatic genetic rescue of a germline ribosome assembly defect
Source: PubMed Central journal article supplement (PMC8377010; doi:10.1038/s41467-021-24999-5), 2021-08-19
Supplement: 41467_2021_24999_MOESM6_ESM.pdf [file 41467_2021_24999_MOESM6_ESM.pdf]

## Reporting Summary

Nature Research wishes to improve the reproducibility of the work that we publish. This form provides structure for consistency and transparency in reporting. For further information on Nature Research policies, see our [Editorial Policies](#) and the [Editorial Policy Checklist](#).

### Statistics

For all statistical analyses, confirm that the following items are present in the figure legend, table legend, main text, or Methods section.

n/a Confirmed

- The exact sample size ( $n$ ) for each experimental group/condition, given as a discrete number and unit of measurement
- A statement on whether measurements were taken from distinct samples or whether the same sample was measured repeatedly
- The statistical test(s) used AND whether they are one- or two-sided  
*Only common tests should be described solely by name; describe more complex techniques in the Methods section.*
- A description of all covariates tested
- A description of any assumptions or corrections, such as tests of normality and adjustment for multiple comparisons
- A full description of the statistical parameters including central tendency (e.g. means) or other basic estimates (e.g. regression coefficient) AND variation (e.g. standard deviation) or associated estimates of uncertainty (e.g. confidence intervals)
- For null hypothesis testing, the test statistic (e.g.  $F$ ,  $t$ ,  $r$ ) with confidence intervals, effect sizes, degrees of freedom and  $P$  value noted  
*Give  $P$  values as exact values whenever suitable.*
- For Bayesian analysis, information on the choice of priors and Markov chain Monte Carlo settings
- For hierarchical and complex designs, identification of the appropriate level for tests and full reporting of outcomes
- Estimates of effect sizes (e.g. Cohen's  $d$ , Pearson's  $r$ ), indicating how they were calculated

*Our web collection on [statistics for biologists](#) contains articles on many of the points above.*

### Software and code

Policy information about [availability of computer code](#)

Data collection See Supplementary Methods File

Data analysis VMD 1.9.3; GROMACS 2019.6; Grace plotting tool v5.1.25; GNU Image Manipulation Program v2.10.24; Image J v10.4; Photoshop CS5; Image Lab (Bio-Rad) v6.0.1; FlowJo v10.7; Prism 9.1.2

For manuscripts utilizing custom algorithms or software that are central to the research but not yet described in published literature, software must be made available to editors and reviewers. We strongly encourage code deposition in a community repository (e.g. GitHub). See the Nature Research [guidelines for submitting code & software](#) for further information.

### Data

Policy information about [availability of data](#)

All manuscripts must include a [data availability statement](#). This statement should provide the following information, where applicable:

- Accession codes, unique identifiers, or web links for publicly available datasets
- A list of figures that have associated raw data
- A description of any restrictions on data availability

Authors can confirm that all relevant data are included in the paper and/or its supplementary information files.

## Field-specific reporting

Please select the one below that is the best fit for your research. If you are not sure, read the appropriate sections before making your selection.

- Life sciences       Behavioural & social sciences       Ecological, evolutionary & environmental sciences

For a reference copy of the document with all sections, see [nature.com/documents/nr-reporting-summary-flat.pdf](https://www.nature.com/documents/nr-reporting-summary-flat.pdf)

## Life sciences study design

All studies must disclose on these points even when the disclosure is negative.

|                 |                                                                                                                                                                                        |
|-----------------|----------------------------------------------------------------------------------------------------------------------------------------------------------------------------------------|
| Sample size     | For each <i>Drosophila</i> experiment, at least 3 replicates were performed and the sample size contained a minimum of 156 flies. These numbers were chosen to provide adequate power. |
| Data exclusions | No data were excluded from the analysis                                                                                                                                                |
| Replication     | Reported results were consistently replicated across multiple experiments, with all replicates generating similar results                                                              |
| Randomization   | Flies of the same genotype were randomly allocated to experimental group                                                                                                               |
| Blinding        | Experimenters were not blinded to fly genotypes as the phenotypes would be clear to any observer.                                                                                      |

## Reporting for specific materials, systems and methods

We require information from authors about some types of materials, experimental systems and methods used in many studies. Here, indicate whether each material, system or method listed is relevant to your study. If you are not sure if a list item applies to your research, read the appropriate section before selecting a response.

### Materials & experimental systems

| n/a                                 | Involved in the study                                           |
|-------------------------------------|-----------------------------------------------------------------|
| <input type="checkbox"/>            | <input checked="" type="checkbox"/> Antibodies                  |
| <input type="checkbox"/>            | <input checked="" type="checkbox"/> Eukaryotic cell lines       |
| <input checked="" type="checkbox"/> | <input type="checkbox"/> Palaeontology and archaeology          |
| <input type="checkbox"/>            | <input checked="" type="checkbox"/> Animals and other organisms |
| <input type="checkbox"/>            | <input checked="" type="checkbox"/> Human research participants |
| <input checked="" type="checkbox"/> | <input type="checkbox"/> Clinical data                          |
| <input checked="" type="checkbox"/> | <input type="checkbox"/> Dual use research of concern           |

### Methods

| n/a                                 | Involved in the study                              |
|-------------------------------------|----------------------------------------------------|
| <input checked="" type="checkbox"/> | <input type="checkbox"/> ChIP-seq                  |
| <input type="checkbox"/>            | <input checked="" type="checkbox"/> Flow cytometry |
| <input checked="" type="checkbox"/> | <input type="checkbox"/> MRI-based neuroimaging    |

## Antibodies

|                 |                                                                                                                                                       |
|-----------------|-------------------------------------------------------------------------------------------------------------------------------------------------------|
| Antibodies used | Listed in Supplementary Table S11.                                                                                                                    |
| Validation      | The anti <i>Drosophila</i> Sbds antibody is validated in Figure 7. All other antibodies are commercially available and validated by the manufacturer. |

## Eukaryotic cell lines

Policy information about [cell lines](#)

|                                                                      |                                                                                                                                                                                                                                                                                                                                                                                                                                              |
|----------------------------------------------------------------------|----------------------------------------------------------------------------------------------------------------------------------------------------------------------------------------------------------------------------------------------------------------------------------------------------------------------------------------------------------------------------------------------------------------------------------------------|
| Cell line source(s)                                                  | Yeast strains and sources are listed in Supplementary Table S6. BGY28, NE0257, NE0259, NE0261, ZBY0001, ZBY0002, ZBY0003, ZBY0004, NE0267, NE0269, NE0271, ZBY0005, ZBY0006, AJW3 were all generated in my lab and are available on request.<br>Dictyostelium cell line Ax2 is available through Dictybase ( <a href="http://dictybase.org/">http://dictybase.org/</a> ), strain ID DBS0235521.<br>HEK293T cell line was obtained from ATCC. |
| Authentication                                                       | Cell lines were authenticated using PCR and genomic sequencing                                                                                                                                                                                                                                                                                                                                                                               |
| Mycoplasma contamination                                             | All cell lines were negative as inferred by negative PCR results.                                                                                                                                                                                                                                                                                                                                                                            |
| Commonly misidentified lines<br>(See <a href="#">ICLAC</a> register) | No commonly misidentified cell lines were used in this study                                                                                                                                                                                                                                                                                                                                                                                 |

## Animals and other organisms

Policy information about [studies involving animals](#); [ARRIVE guidelines](#) recommended for reporting animal research

|                         |                                                                                                                                                                                                                                                                                                                                                                                                                                                                                                                                     |
|-------------------------|-------------------------------------------------------------------------------------------------------------------------------------------------------------------------------------------------------------------------------------------------------------------------------------------------------------------------------------------------------------------------------------------------------------------------------------------------------------------------------------------------------------------------------------|
| Laboratory animals      | We used <i>Drosophila melanogaster</i> strains listed in Supplementary Table S2a. w1118, gift from J. Root (University of Cambridge UK); w1118; PBac{WH}CG8549f01686/TM6B, Tb1, Exelixis (Harvard); w1118; pUAS-8549-R4, NIG-Fly; W1118;P{en2.4-GAL4}e16E, P{UAS-2xEGFP}AH2, Bloomington Drosophila Stock Center; w1118 P{GawB-ΔKE}BxMS1096-KE, Bloomington Drosophila Stock Center; P{KK101259}VIE-260B, Vienna Drosophila Resource Center. Either adult flies or larvae were used as specified in the Methods and Figure legends. |
| Wild animals            | This study did not involve wild animals                                                                                                                                                                                                                                                                                                                                                                                                                                                                                             |
| Field-collected samples | This study did not involve samples collected in the field.                                                                                                                                                                                                                                                                                                                                                                                                                                                                          |
| Ethics oversight        | Ethics approval was not required for experiments on invertebrates                                                                                                                                                                                                                                                                                                                                                                                                                                                                   |

Note that full information on the approval of the study protocol must also be provided in the manuscript.

## Human research participants

Policy information about [studies involving human research participants](#)

|                            |                                                                                                                                                                                                                                                                                                                                                                                                                   |
|----------------------------|-------------------------------------------------------------------------------------------------------------------------------------------------------------------------------------------------------------------------------------------------------------------------------------------------------------------------------------------------------------------------------------------------------------------|
| Population characteristics | Blood and/or bone marrow samples were obtained from patients with Shwachman-Diamond syndrome (Age and gender are listed in Supplementary data 1)                                                                                                                                                                                                                                                                  |
| Recruitment                | Samples were collected from consenting patients attending hospital out-patient clinics                                                                                                                                                                                                                                                                                                                            |
| Ethics oversight           | Informed and written consent was obtained from donors and patients. The study and protocols comply with the 1975 Declaration of Helsinki as well as with the local legislation and ethical guidelines from the Comité de Protection des Personnes de l'Île de France II and the French advisory committee on data processing in medical research. The INSERM Institutional Review Board also approved this study. |

Note that full information on the approval of the study protocol must also be provided in the manuscript.

## Flow Cytometry

### Plots

Confirm that:

- The axis labels state the marker and fluorochrome used (e.g. CD4-FITC).
- The axis scales are clearly visible. Include numbers along axes only for bottom left plot of group (a 'group' is an analysis of identical markers).
- All plots are contour plots with outliers or pseudocolor plots.
- A numerical value for number of cells or percentage (with statistics) is provided.

### Methodology

|                           |                                                                            |
|---------------------------|----------------------------------------------------------------------------|
| Sample preparation        | The methodology is described in detail in the methods section of the paper |
| Instrument                | FACScalibur.                                                               |
| Software                  | FlowJo                                                                     |
| Cell population abundance | The percentage are indicated in the Supplementary figure Fig.5             |
| Gating strategy           | FSC/SSC gates were used to analyse living cells.                           |

- Tick this box to confirm that a figure exemplifying the gating strategy is provided in the Supplementary Information.
